# Supplementary material
Source: MDPI journal article supplement (https://www.mdpi.com/2073-4441/13/11/1457)
Supplement: s1 [file s1]

Archive with 3 entries (3 files):
- S1. Online resources watering and crop growth.pdf
- S2. Livestock on allotments.pdf
- S3. French Drains.pdf
