# Supplementary material
Source: MDPI journal article supplement (https://www.mdpi.com/2073-4441/13/11/1457)
Supplement: s1 [file s1 › S1. Online resources watering and crop growth.pdf]

## S1. Online resources with guidance and advice on watering and crop growth

### UK resources

Harper Adams University [Drought impacts on agricultural and horticultural crops](#)  
Royal Horticultural Society advice on vegetables: [care during drought](#)  
Royal Horticultural Society [advice on drought and watering strategy](#)  
Royal Horticultural Society [advice on weather damage](#)  
Royal Horticultural Society [advice on drought-resistant gardening](#)  
Eden project guide to [plants for a changing climate](#)  
Eden project guide to [10 best drought-tolerant plants for your garden](#)  
Eden project guide to [saving water at Eden](#)  
Allotment and Gardens monthly [guidance on growing fruit & vegetable](#)  
Sport England guidance on [dealing with droughts](#)  
STRI Group guidance on [green infrastructure](#)  
Institute of Groundsmanship [guidance on watering during the drought](#)  
Environment Agency [guide to tackling a summer drought begins now](#)  
ADHB guide Drought – [how to manage the continued dry weather](#)  
ADHB Podcast: [Managing grass after the drought](#)  
ADHB guide [Drought – nutrient management](#)  
ADHB guide [Seasonal water management for potatoes](#)  
ADHB guide [Drought – burn-down and harvest](#)  
ADHB guide [Coping during drought \(& heat\) in the short term](#)  
Global Food Security Agriculture's [impacts on water availability](#)

### Livestock on allotments

<https://www.allaboutallotments.co.uk/livestock-wildlife>  
<https://www.nsalg.org.uk/allotment-info/hens-on-allotments/>

### Non-UK resources

Australian Government [guide to outdoor water use](#)  
Australian [online calculator for outdoor water savings](#)  
Australian Government [guide to rainwater](#)  
Australian Government [guide to stormwater](#)  
Australian Government [guide to waterless toilet](#)  
California Water Conservation Portal [suggestions to conserve water](#)
